# Supplementary material for: Developmental exposure to domoic acid targets reticulospinal neurons and leads to aberrant myelination in the spinal cord
Source: bioRxiv or medRxiv preprint supplement (doi:10.1101/2022.08.08.503200), 2022-08-11
Supplement: Supplementary file [file media-1.pdf]

## Supplemental Material

### Developmental exposure to domoic acid targets reticulospinal neurons and leads to aberrant myelination in the spinal cord

Jennifer M. Panlilio,<sup>1,2,3#,\*</sup> Katherine M. Hammar<sup>4</sup>  
Neelakanteswar Aluru<sup>1,3</sup> and Mark E. Hahn<sup>1,3</sup>

<sup>1</sup>Biology Department, Woods Hole Oceanographic Institution, Woods Hole, MA 02543

<sup>2</sup>Massachusetts Institute of Technology (MIT) – Woods Hole Oceanographic Institution (WHOI)  
Joint Graduate Program in Oceanography and Oceanographic Engineering

<sup>3</sup>Woods Hole Center for Oceans and Human Health, Woods Hole, MA, USA 02543

<sup>4</sup>Central Microscopy Facility, Marine Biological Laboratory, 7 MBL Street, Woods Hole, MA,  
USA, 02543

#Current address: Eunice Kennedy Shriver National Institute of Child Health and Human  
Development (NICHD), Division of Developmental Biology, Bethesda, MD, USA 20892

\*Corresponding author

**KEYWORDS:** Harmful algal blooms, Domoic acid, Reticulospinal neurons, Mauthner neuron,  
Myelin, Oligodendrocytes, Oligodendrocyte precursor cells

A.

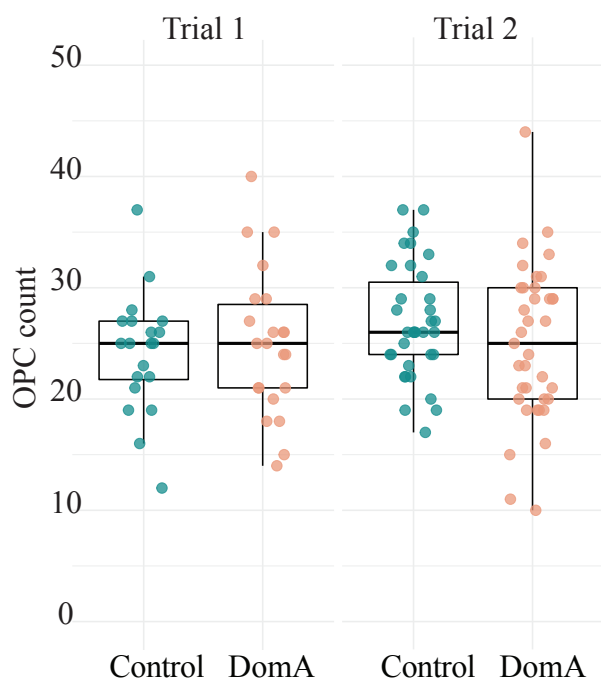

B.

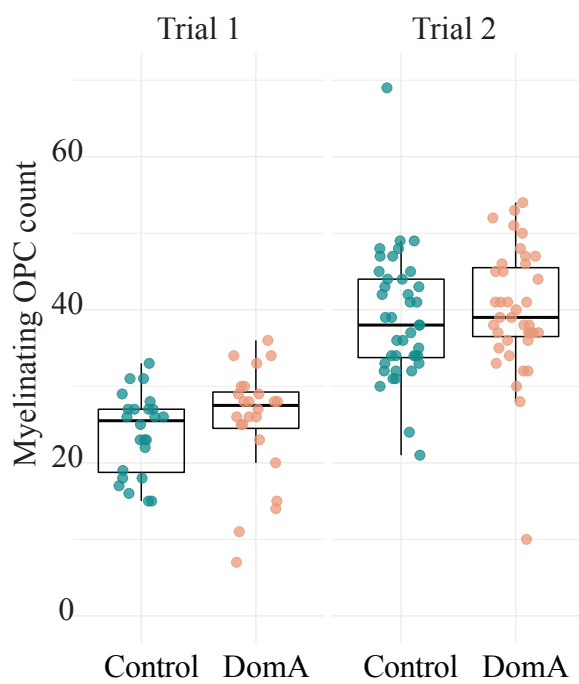

**Supplemental Figure 1: Trial differences in oligodendrocyte precursor cell counts.**

**Supplemental Figure 1: Trial differences in oligodendrocyte precursor cell counts**

- (A) Oligodendrocyte precursor cell (OPC) count in the dorsal spinal cords in the double transgenic fish, *Tg(sox10:mRFP) x Tg(olig2:EGFP)*, imaged at 2.5 dpf. Each point represents the number of OPCs counted within the 403.1 $\mu$ M imaging area in a single fish. There were no differences in OPC count based on treatment or on repeat trials.
- (B) Oligodendrocyte precursor cell (OPC) count in dorsal spinal cords of the 354.3 $\mu$ M long region in the dorsal spinal cords in the double transgenic fish, *Tg(sox10:RFP) x Tg(nkx2.2a:mEGFP)*, imaged at 2.5 dpf. Each point represents the number of OPCs counted within the 354.3 $\mu$ M imaging area in a single fish. While there were no differences in OPC count based on treatment, there were differences in OPC count between the two repeat trials.

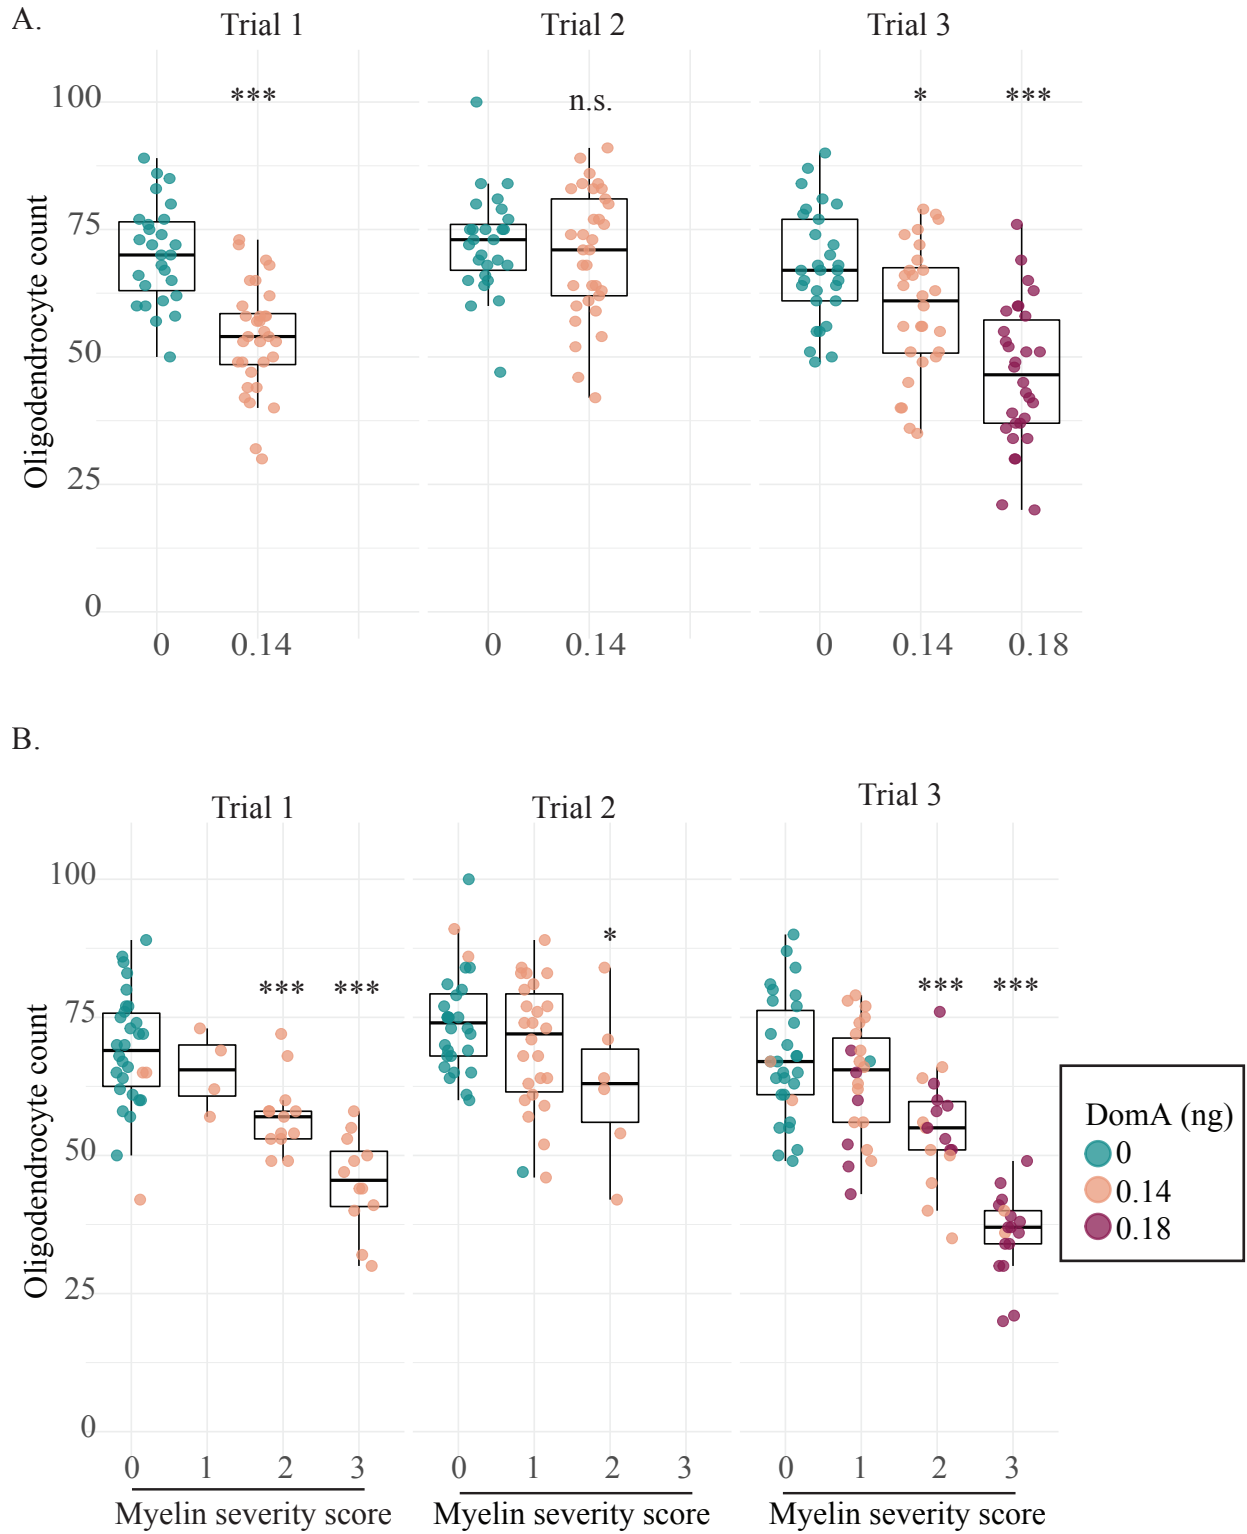

**Supplemental Figure 2: Trial differences in myelinating oligodendrocyte cell counts**

### **Supplemental Figure 2: Trial differences in myelinating oligodendrocyte cell counts**

(A) Myelinating oligodendrocyte count in the spinal cords. *Tg(mbp:EGFP)* imaged at 2.5 dpf. Individual points represent myelinating oligodendrocyte counts within the 403.9 $\mu$ M imaging area in a single fish. Trial 2 shows no significant differences between control (0 ng DomA) and domoic acid exposed fish (0.14 ng DomA). In 2 out of the 3 trials, DomA treatment significantly reduced the number of oligodendrocytes (DomA-exposed larvae (0.14 ng) (Coefficient = -0.268, Error= 0.043, p = 6.13 e-10 and Coefficient = -0.136, Error = 0.059, p=0.02 respectively).

Fish were further subdivided by the severity of the myelin defect observed. No treated fish in Trial 2 had myelin with the most severe score (category 3)

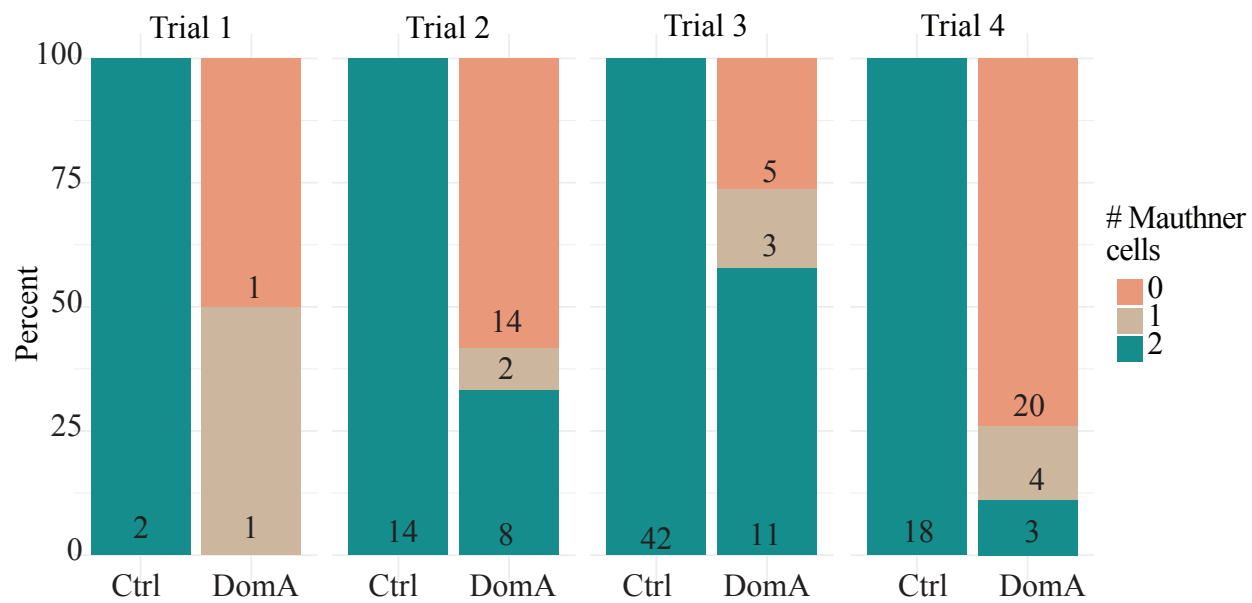

**Supplemental Figure 3: Trial differences in Mauthner cell counts.**

**Supplemental Figure 3: Trial differences in Mauthner cell counts.**

Percentage of embryos exposed to DomA (2 dpf) or vehicle that had 0, 1, or 2 Mauthner cells as visualized by staining with anti-3A10 at 60 hpf. Numbers of larvae with each phenotype are listed within each bar. Data for the individual experimental trials are shown. The degree of DomA-induced losses in Mauthner cells varied among repeated experiments. In 3 out of 4 trials, the majority of DomA-exposed fish had 0 out of the 2 Mauthner cells (Supplemental Fig. 3). Nonetheless, in all trials, DomA-exposed fish showed Mauthner cell numbers that were significantly different from controls ( $p < 10^{-13}$ ).

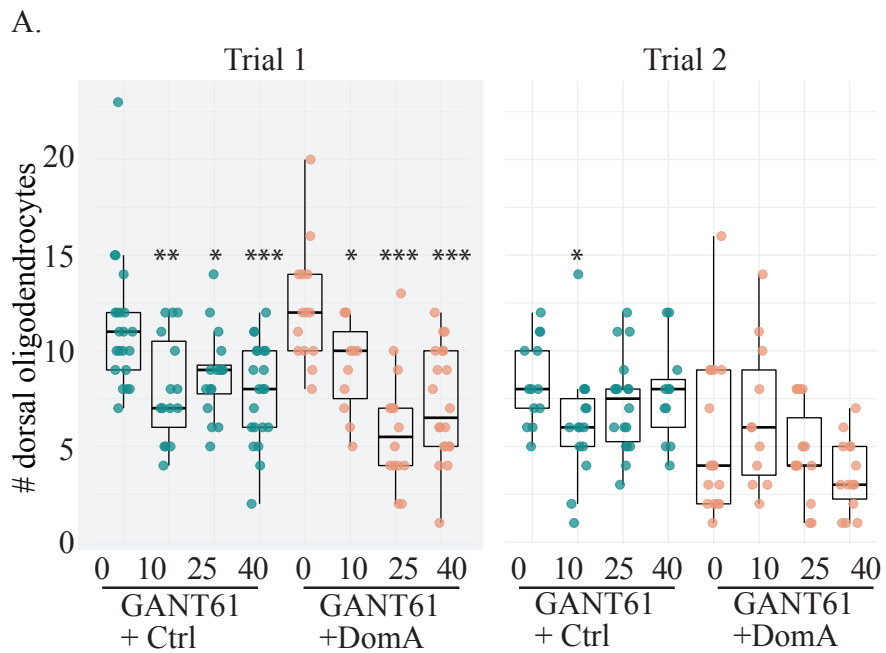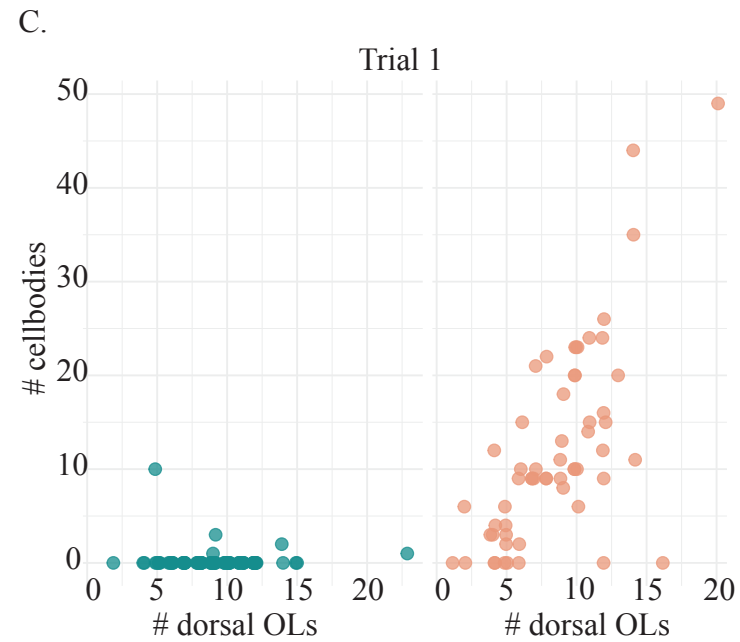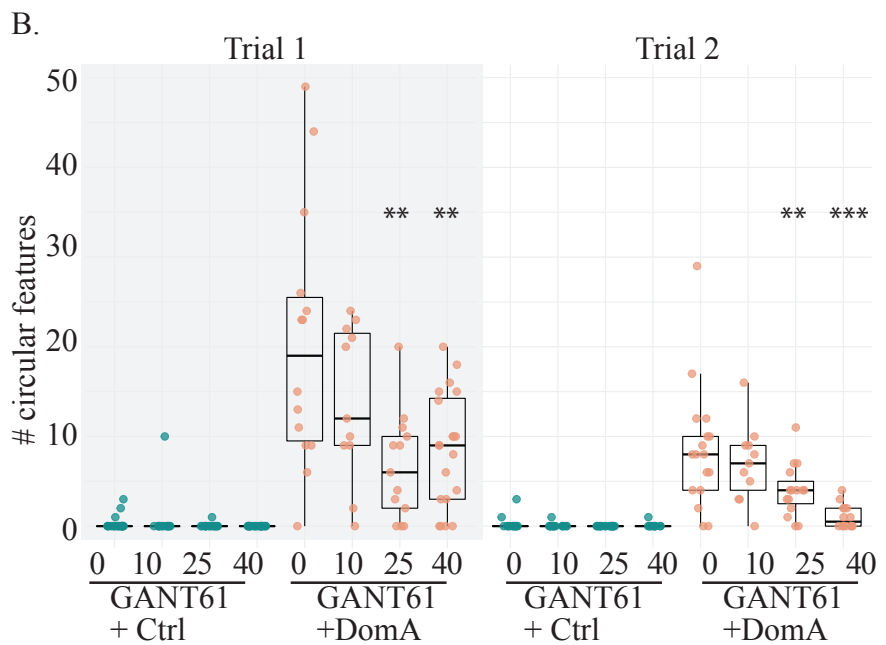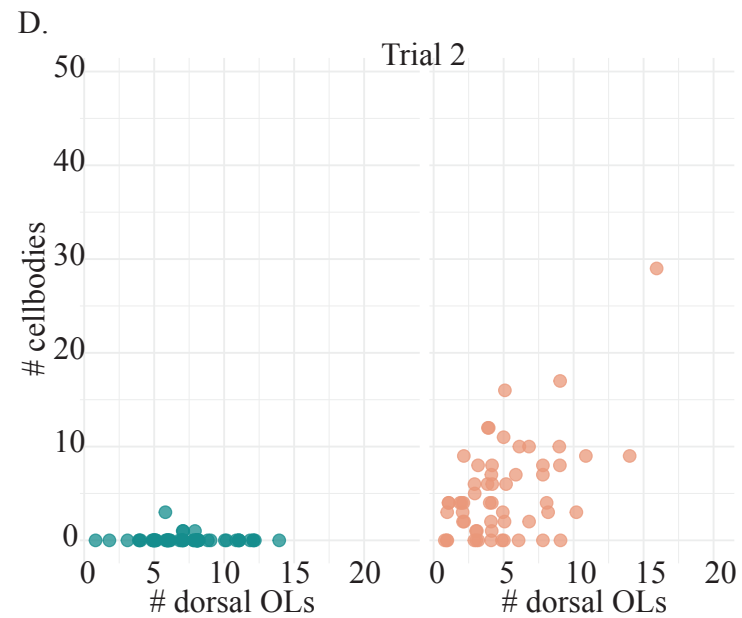

**Supplemental Figure 4: Trial differences in GANT61 treatment**



#### **Supplemental Figure 4: Trial differences in GANT61 treatment**

- (A) Number of myelinating oligodendrocytes in dorsal spinal cord of control and DomA-exposed fish that were also exposed to different concentrations of GANT61 (1.5- 4 dpf). Each point represents the number of oligodendrocytes counted within a 269  $\mu\text{M}$  imaging area in a single fish.
  - (B) Total number of circular features in dorsal spinal cord of the control and DomA-exposed fish that were exposed to different concentrations of GANT61.
  - (C) The number of circular features plotted against the number of dorsal oligodendrocytes in Trial 1
  - (D) The number of circular features plotted against the number of dorsal oligodendrocytes in Trial 2
- \* =  $p < 0.05$ , \*\* =  $p < 0.01$ , \*\*\*  $p < 0.001$  by generalized mixed models with a Poisson or a negative binomial distribution.
